# Supplementary material for: Halogen bonding effect on electrochemical anion oxidation in ionic liquids
Source: Royal Society of Chemistry journal article supplement (doi:10.1039/d1ob01031j), 2021-01-01
Supplement: d1ob01031j1.pdf [file d1ob01031j1.pdf]

## SUPPORTING INFORMATION

### Halogen bonding effect on electrochemical anion oxidation in Ionic Liquids.

Marie Alvarez,<sup>a</sup> Cedric Houzé,<sup>a</sup> Sihem Groni,<sup>a</sup> Bernd Schöllhorn<sup>\*a</sup> and Claire Fave<sup>\*a</sup>

[a] Laboratoire d'Electrochimie Moléculaire, UMR CNRS 7591, Université de Paris, 15 rue Jean-Antoine de Baïf, F-75205 Paris Cedex 13, France.

#### Contents

|                                                              |    |
|--------------------------------------------------------------|----|
| 1. Syntheses and Characterization .....                      | 2  |
| 2. Physicochemical Characterizations .....                   | 6  |
| 3. Electrochemical Characterization.....                     | 7  |
| <b>4.1 when ILs are used as supporting electrolyte</b> ..... | 7  |
| <b>4.2 when ILs are used pure</b> .....                      | 8  |
| 4. Single Crystal XRD.....                                   | 9  |
| 5. NMR Titration .....                                       | 11 |
| <b>6.1 NMR titration with H-IL</b> .....                     | 11 |
| <b>6.2 NMR titration with Me-IL</b> .....                    | 12 |
| <b>6.3 NMR titration with I-IL</b> .....                     | 13 |
| 6. Electrochemical behavior of Lewis Bases in ILs.....       | 19 |
| 7. NMR spectra of commercially TBAX.....                     | 23 |
| 8. References.....                                           | 24 |

# 1. Syntheses and Characterization

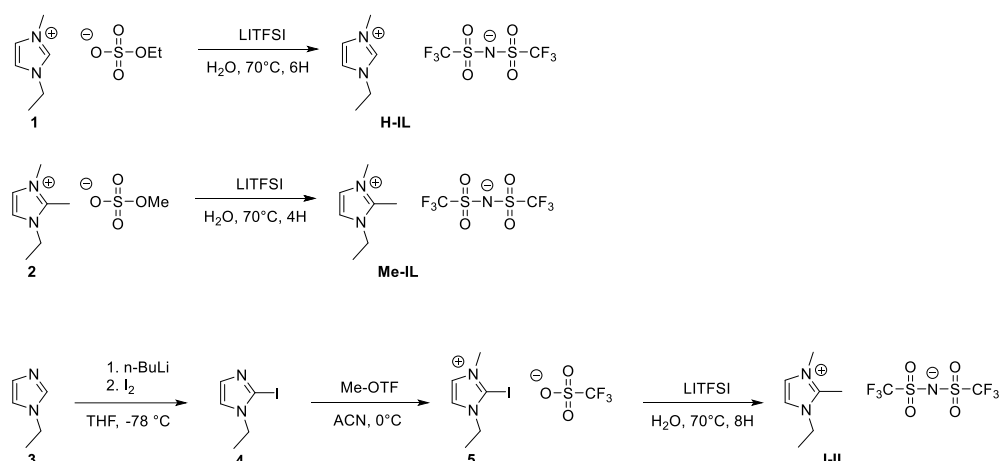

**Scheme S1.** General reaction scheme for the synthesis of 1-Ethyl-methylimidazolium bis(trifluoromethane)sulfonimide (**H-IL**), 1-Ethyl-2,3-dimethylimidazolium bis(trifluoromethane)sulfonimide (**Me-IL**) and 1-Ethyl-2-iodo-3-methylimidazolium(bis(trifluoromethane)sulfonimide (**I-IL**).

## 1-Ethyl-methylimidazolium bis(trifluoromethane)sulfonimide (**H-IL**)<sup>1</sup>

**1** (78 mmol, 1 eq) was diluted in 40 mL of water and then a solution of LiTFSI (87 mmol, 1.1 eq) in water (30 mL) was added. The solution was then heated to 70°C for 6 hours and stirred to obtain a homogeneous mixture. CH<sub>2</sub>Cl<sub>2</sub> (70 mL) was then added to the aqueous solution. After extraction, the organic phase was dried over MgSO<sub>4</sub> and after evaporation a colorless liquid **H-IL** was obtained in 92% yield.

<sup>1</sup>H NMR (400 MHz, CD<sub>3</sub>CN) δ = 8.39 (s, 1H, N-CH-N), 7.37 (d, J = 2.1 Hz, 1H, N-CH-CH-N), 7.32 (d, J = 2.1 Hz, 1H, N-CH-CH-N), 4.16 (q, J = 7.3 Hz, 2H, N-CH<sub>2</sub>-CH<sub>3</sub>), 3.81 (s, 3H, N-CH<sub>3</sub>), 1.45 (t, J = 7.3 Hz, 3H, N-CH<sub>2</sub>-CH<sub>3</sub>).

<sup>13</sup>C NMR (101 MHz, CD<sub>3</sub>CN) δ = 137.0 (s, N-CH-N), 125.1 (s, N-CH-CH-N), 123.4 (s, N-CH-CH-N), 46.3 (s, N-CH<sub>2</sub>-CH<sub>3</sub>), 37.2 (s, N-CH<sub>3</sub>), 15.6 (s, N-CH<sub>2</sub>-CH<sub>3</sub>).

<sup>19</sup>F NMR (377 MHz, CD<sub>3</sub>CN) δ = -80.2 (s, 6F, CF<sub>3</sub>).

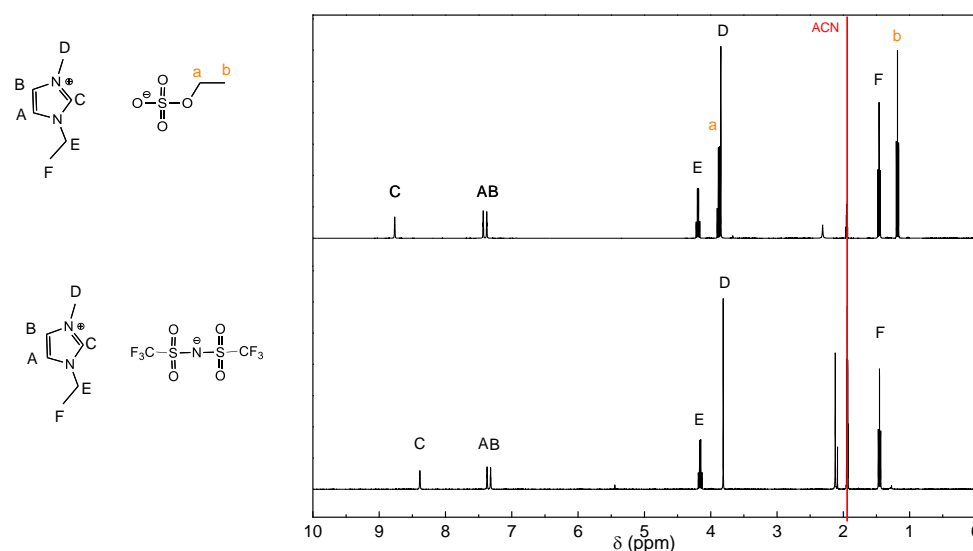

**Figure S1 :** <sup>1</sup>H NMR spectrum of **1** (up) and **H-IL** (Down) in CD<sub>3</sub>CN-d<sub>6</sub>.

## 1-Ethyl-2,3-dimethylimidazolium bis(trifluoromethane)sulfonimide (**Me-IL**)<sup>1</sup>

**2** (78 mmol, 1 eq) was diluted in 50 mL of water and then a solution of LiTFSI (87 mmol, 1.1 eq) in water (50 mL) was added. The solution was then heated to 70°C for 4 hours and stirred to obtain a homogeneous mixture.

CH<sub>2</sub>Cl<sub>2</sub> (70 mL) was then added to the aqueous solution. After extraction, the organic phase was dried over MgSO<sub>4</sub> and after evaporation a yellow liquid **Me-IL** was obtained in 89% yield.

**<sup>1</sup>H NMR** (400 MHz, CD<sub>3</sub>CN) δ= 7.26 (d, J = 2.1 Hz, 1H, N-CH-CH-N), 7.23 (d, J = 2.1 Hz, 1H, N-CH-CH-N), 4.07 (q, J = 7.3 Hz, 2H, N-CH<sub>2</sub>-CH<sub>3</sub>), 3.68 (s, 3H, N-CH<sub>3</sub>), 2.49 (s, 3H, C-CH<sub>3</sub>), 1.38 (t, J = 7.3 Hz, 3H, N-CH<sub>2</sub>-CH<sub>3</sub>).

**<sup>13</sup>C NMR** (101 MHz, CD<sub>3</sub>CN) δ= 145.7 (s, N-C-N), 123.8 (s, N-CH-CH-N), 121.6 (s, N-CH-CH-N), 44.9 (s, N-CH<sub>2</sub>-CH<sub>3</sub>), 36.0 (s, N-CH<sub>3</sub>), 15.2 (s, C-CH<sub>3</sub>), 10.2 (s, N-CH<sub>2</sub>-CH<sub>3</sub>).

**<sup>19</sup>F NMR** (377 MHz, CD<sub>3</sub>CN) δ= -80.2 (s, CF<sub>3</sub>).

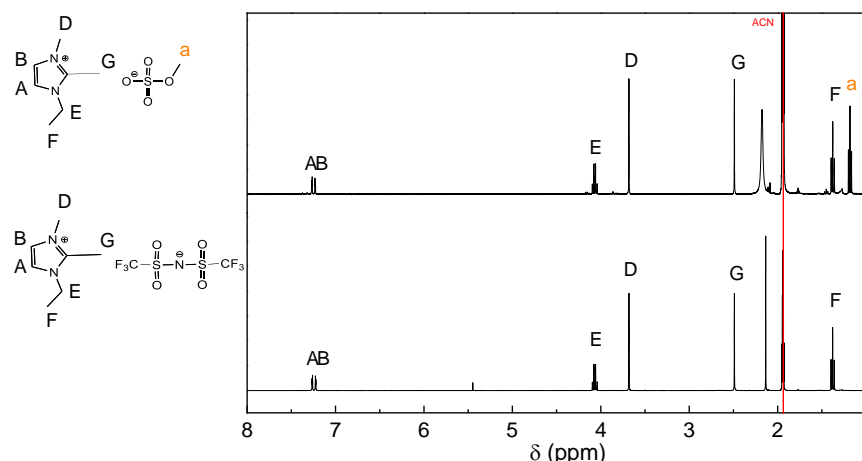

**Figure S2** : <sup>1</sup>H NRM spectrum of **2** (up) and **Me-IL** (Down) in CD<sub>3</sub>CN-d<sub>6</sub>

### 1-Ethyl-2-iodoimidazole (**4**)<sup>2</sup>

1-Ethyl-imidazole **3** (0.10 mol, 1 eq) was dissolved in 200 mL of anhydrous THF at 0°C under Argon and agitation. A solution of BuLi at 1.6 M in hexane (0.13 mol, 1.25 eq) was then added drop by drop and shake for 1h30. Then a solution of I<sub>2</sub> (0.13 mol, 1.25 eq) in 15 mL THF anhydrous was carefully added at -78°C and then let it rise to room temperature and stir for 6 hours. The solvent was then evaporated and a saturated solution of sodium thiosulfate added. After extraction with CH<sub>2</sub>Cl<sub>2</sub> and Flash chromatograph (Methanol/ CH<sub>2</sub>Cl<sub>2</sub> (0.25/99.75)) the compound **4** was obtained as a yellow liquid and in 71.9% yield.

**<sup>1</sup>H NMR** (400 MHz, CD<sub>3</sub>CN) δ= 7.20 (s, 1H, N-CH-CH-N), 6.99 (s, 1H, N-CH-CH-N), 3.93 (q, J = 7.3 Hz, 2H, N-CH<sub>2</sub>-CH<sub>3</sub>), 1.33 (t, J = 7.3 Hz, 3H, N-CH<sub>2</sub>-CH<sub>3</sub>).

**<sup>13</sup>C NMR** (101 MHz, CD<sub>3</sub>CN) δ= 133.3 (s, N-CH-CH-N), 124.1 (s, N-CH-CH-N), 90.4 (s, N-CH<sub>3</sub>), 45.6 (s, N-CH<sub>2</sub>-CH<sub>3</sub>), 16.4 (s, N-CH<sub>2</sub>-CH<sub>3</sub>).

### 1-Ethyl-2-iodo-3-methylimidazolium triflate (**5**)<sup>3</sup>

Compound **4** (50 mmol, 1 eq) was dissolved in 100 mL of ACN and CF<sub>3</sub>SO<sub>2</sub>OCH<sub>3</sub> (77.5 mmol, 1.55 eq) was added at 0°C. The solution was stirred for 12 hours at room temperature. After evaporation of the solvent, the ionic liquid was washed twice with diethylether. The solvent was evaporated to give **5** in 42% yield.

**<sup>1</sup>H NMR** (400 MHz, CD<sub>3</sub>CN) δ= 7.62 (d, J = 2.1 Hz, 1H, N-CH-CH-N), 7.60 (d, J = 1.9 Hz, 1H, N-CH-CH-N), 4.15 (q, J = 7.3 Hz, 2H, N-CH<sub>2</sub>-CH<sub>3</sub>), 3.78 (s, 3H, N-CH<sub>3</sub>), 1.41 (t, J = 7.3 Hz, 3H, N-CH<sub>2</sub>-CH<sub>3</sub>).

**<sup>13</sup>C NMR** (101 MHz, CD<sub>3</sub>CN) δ= 128.1 (s, N-CH-CH-N), 126.1 (s, N-CH-CH-N), 49.5 (s, N-CH<sub>2</sub>-CH<sub>3</sub>), 40.6 (s, N-CH<sub>3</sub>), 15.3 (s, N-CH<sub>2</sub>-CH<sub>3</sub>).

### 1-Ethyl-2-iodo-3-methylimidazolium bis(trifluoromethane)sulfonimide (**I-IL**)

**5** (25 mmol, 1 eq) was dissolved in 100 mL of water and then LiTFSI (31 mmol, 1.25 eq) was added. The solution was stirred for 8 hours at 70°C. After filtration, the ionic liquid was separated from aqueous solution and dried over MgSO<sub>4</sub>. The light brown liquid **I-IL** is obtained in 68% yield.

**<sup>1</sup>H NMR** (400 MHz, CD<sub>3</sub>CN) δ= 7.60 (d, J = 2.1 Hz, 1H, N-CH-CH-N), 7.58 (d, J = 2.1 Hz, 1H, N-CH-CH-N), 4.15 (q, J = 7.3 Hz, 2H, N-CH<sub>2</sub>-CH<sub>3</sub>), 3.78 (s, 3H N-CH<sub>3</sub>), 1.41 (t, J = 7.3 Hz, 3H, N-CH<sub>2</sub>-CH<sub>3</sub>).

**<sup>13</sup>C NMR** (101 MHz, CD<sub>3</sub>CN) δ= 128.1 (s, N-CH-CH-N), 126.1 (s, N-CH-CH-N), 49.5 (s, N-CH<sub>2</sub>-CH<sub>3</sub>), 40.7 (s, N-CH<sub>3</sub>), 15.2 (s, N-CH<sub>2</sub>-CH<sub>3</sub>).

**<sup>19</sup>F NMR** (377 MHz, CD<sub>3</sub>CN) δ= -80.18 (s, CF<sub>3</sub>).

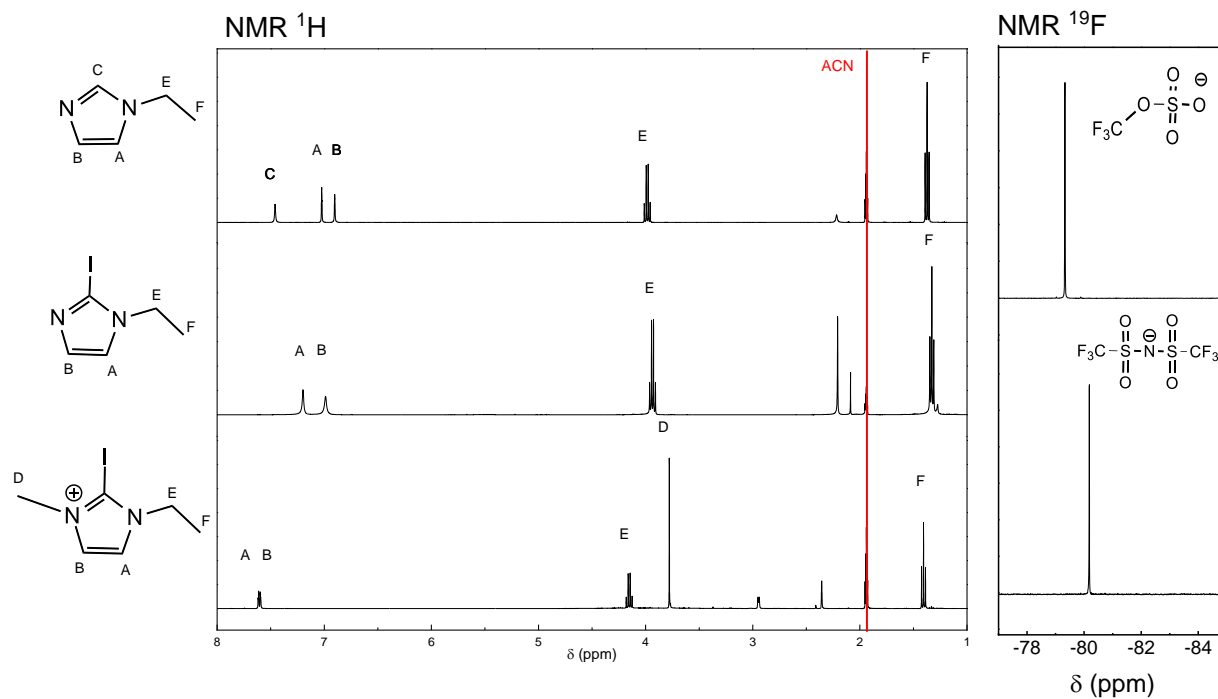

**Figure S3** : Left: NMR <sup>1</sup>H spectrum superposition of **3** (Top), **4** (Middle) and **I-IL** (Bottom). Right: NMR <sup>19</sup>F spectrum superposition of **5** (Top) and **I-IL** (Bottom).

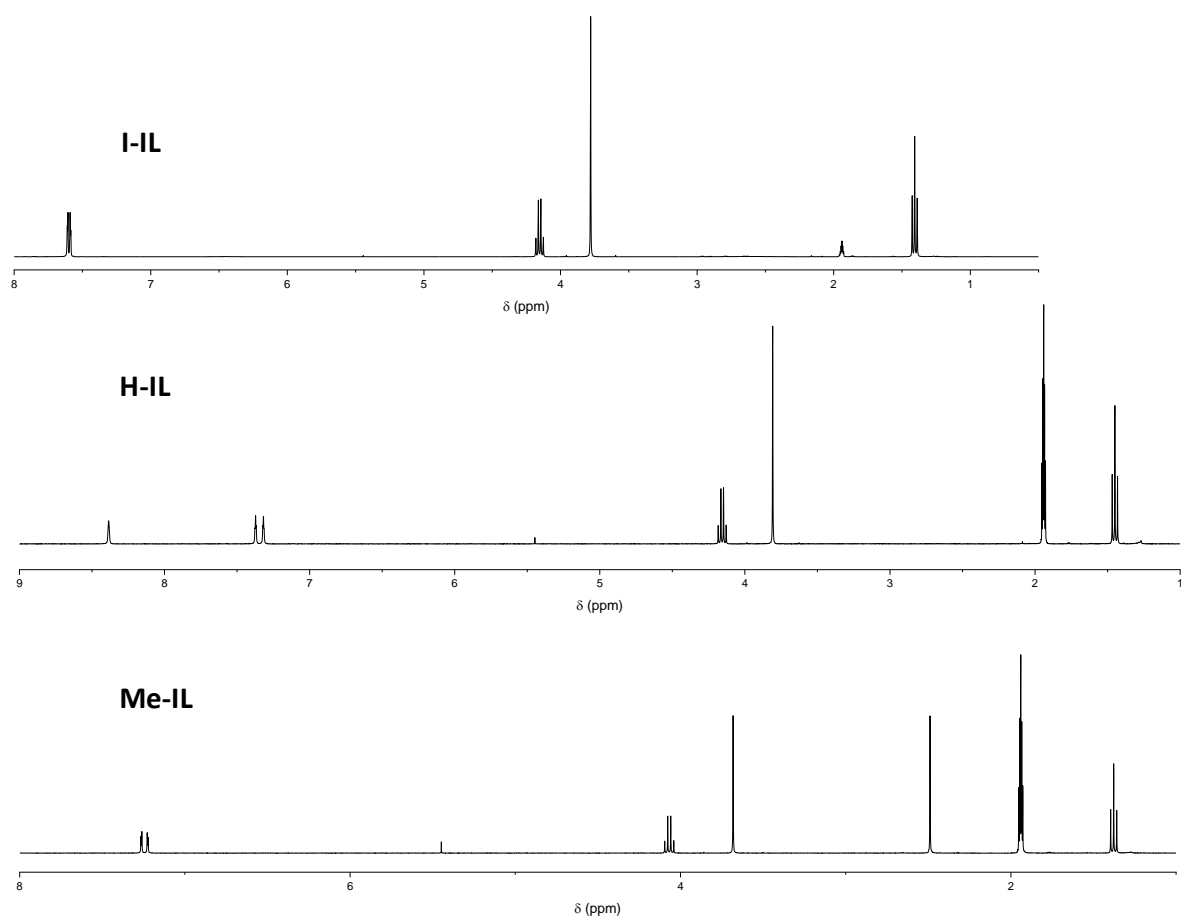

**Figure S4** : NMR  $^1\text{H}$  spectra in  $\text{CD}_3\text{CN}$ : superposition of the ILs **I-IL** (Top), **H-IL** (Middle) and **Me-IL** (Bottom)

## 2. Physicochemical Characterizations

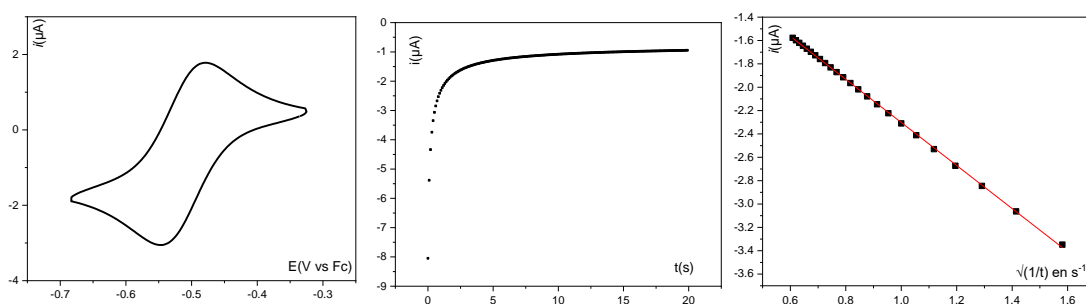

**Figure S5:** Left) CV of decamethylferrocene, dmfc ( $c = 4 \text{ mM}$ ) on glassy carbon electrode in **H-IL** at  $40^\circ\text{C}$  vs Fc,  $\nu = 0.1\text{V.s}^{-1}$ . Middle) Chrono-amperometry at  $E_{\text{app}} = -0.61 \text{ V vs Fc}$  for  $t = 20\text{s}$ . Right) Linear regression of  $I(t) = nFAC\sqrt{D/\pi t}$  with  $I$  current (A),  $n$  number of electron (mol),  $F$  faraday constant ( $\text{C.mol}^{-1}$ )  $A$  electrode surface area ( $\text{cm}^2$ ),  $C$  concentration ( $\text{mol.cm}^{-3}$ ) and  $D$  diffusion coefficient ( $\text{cm}^2.\text{s}^{-1}$ ).

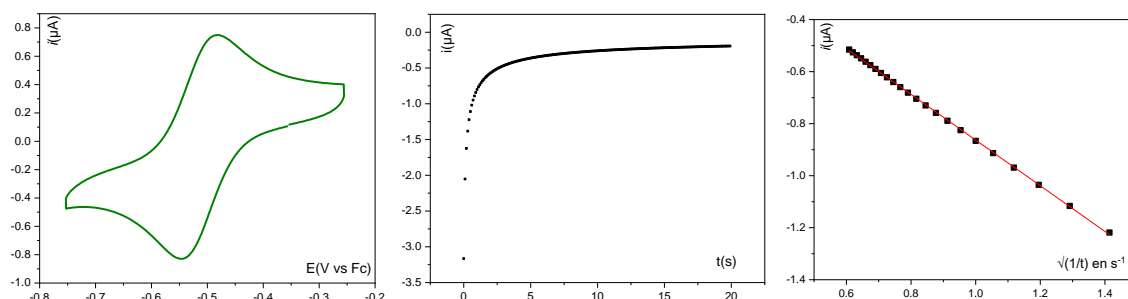

**Figure S6:** Left) CV of decamethylferrocene, dmfc ( $c = 3.5 \text{ mM}$ ) on glassy carbon electrode in **Me-IL** at  $40^\circ\text{C}$  vs Fc,  $\nu = 0.1\text{V.s}^{-1}$ . Middle) Chrono-amperometry at  $E_{\text{app}} = -0.61 \text{ V vs Fc}$  for  $t = 20\text{s}$ . Right) Linear regression of  $I(t) = nFAC\sqrt{D/\pi t}$  with  $I$  current (A),  $n$  number of electron (mol),  $F$  faraday constant ( $\text{C.mol}^{-1}$ )  $A$  electrode surface area ( $\text{cm}^2$ ),  $C$  concentration ( $\text{mol.cm}^{-3}$ ) and  $D$  diffusion coefficient ( $\text{cm}^2.\text{s}^{-1}$ ).

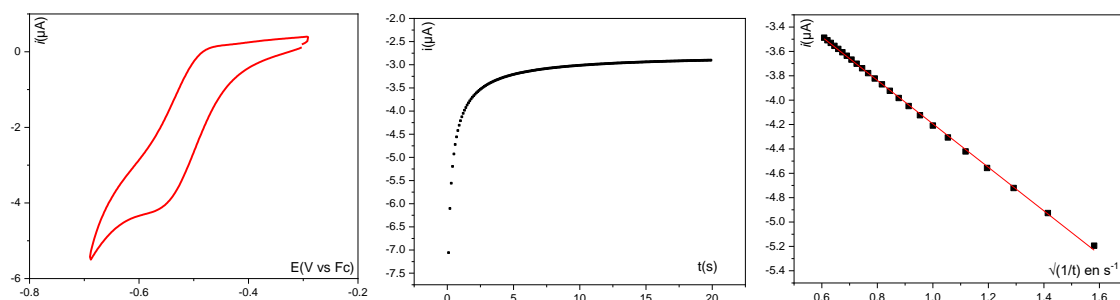

**Figure S7:** Left) CV of decamethylferrocene, dmfc ( $c = 5 \text{ mM}$ ) on glassy carbon electrode in **I-IL** at  $60^\circ\text{C}$  vs Fc,  $\nu = 0.1\text{V.s}^{-1}$ . Middle) Chrono-amperometry at  $E_{\text{app}} = -0.61 \text{ V vs Fc}$  for  $t = 20\text{s}$ . Right) Linear regression of  $I(t) = nFAC\sqrt{D/\pi t}$  with  $I$  current (A),  $n$  number of electron (mol),  $F$  faraday constant ( $\text{C.mol}^{-1}$ )  $A$  electrode surface area ( $\text{cm}^2$ ),  $C$  concentration ( $\text{mol.cm}^{-3}$ ) and  $D$  diffusion coefficient ( $\text{cm}^2.\text{s}^{-1}$ ).

### 3. Electrochemical Characterization

#### 4.1 when ILs are used as supporting electrolyte

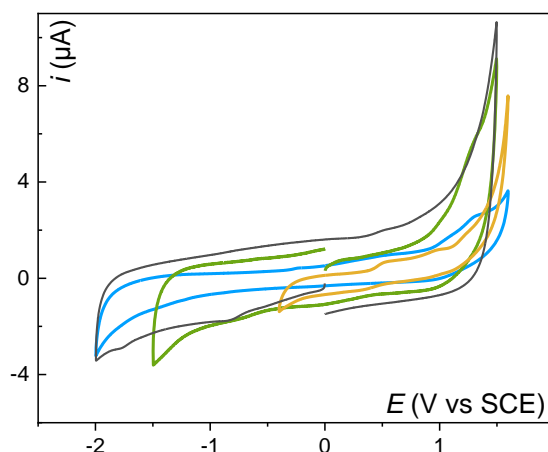

**Figure S8:** CV on glassy carbon electrode in DMF 40°C vs SCE, with 0.1 M TBAPF<sub>6</sub> (grey trace), 0.1 M H-IL (blue trace), 0.1 M Me-IL (green trace) and 0.1 M I-IL (orange trace).  $\nu = 0.1 \text{ V.s}^{-1}$ .

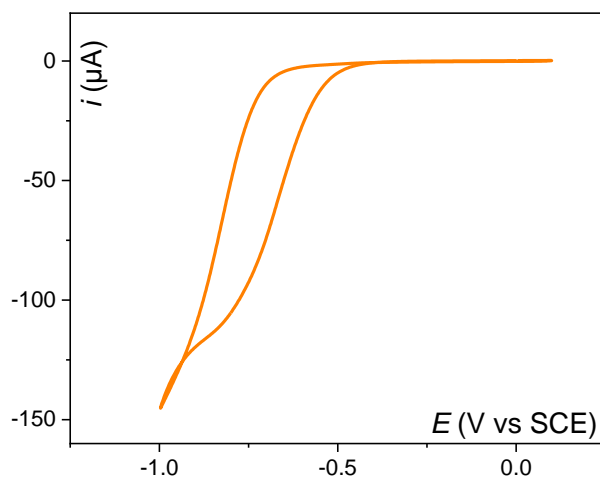

Figure 1

**Figure S9:** CV recorded on glassy carbon electrode in 0.1 M I-IL / DMF at 40°C.  $\nu = 0.1 \text{ V.s}^{-1}$ .

## 4.2 when ILs are used pure

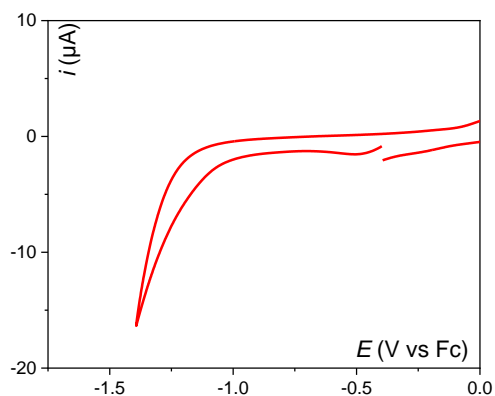

**Figure S10:** CV on glassy carbon of pure I-IL in reduction at 60°C;  $\nu = 0.1 \text{ V.s}^{-1}$ .

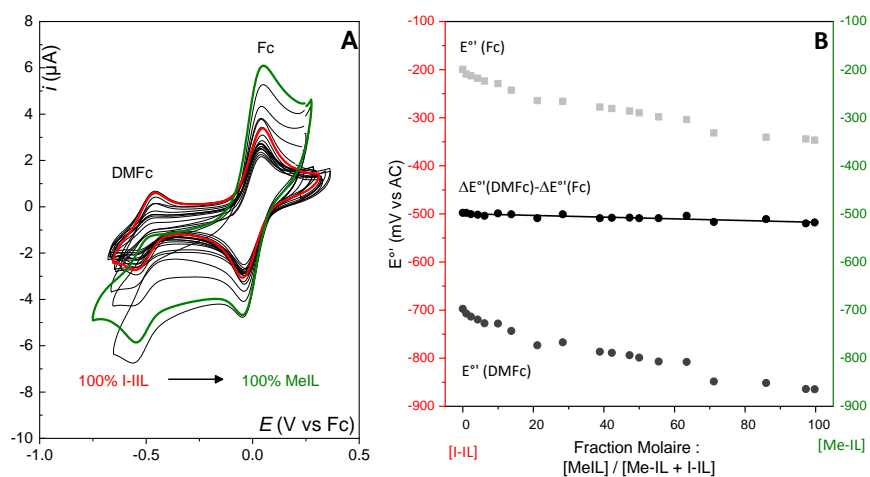

**Figure S11: A)** CV of Fc (3mM) and DMFc (1.6mM) at 60°C in I-IL (Red trace). Addition of Me-IL (Black trace) until a pure solution of Me-IL is obtained (Green trace). **B)** Standard potential of Fc (light Grey Square), DMFc (Dark Grey Circle), and as a function of Me-IL Molar fraction.

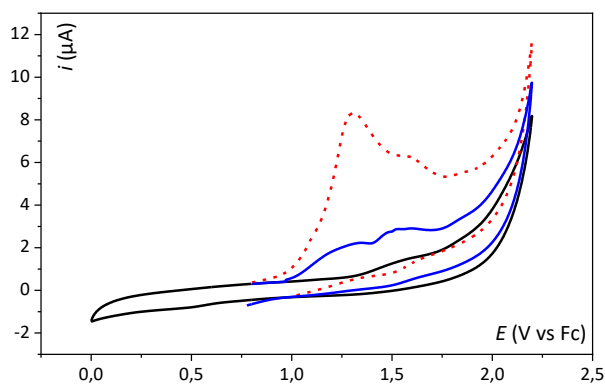

**Figure S12 :** CV on glassy carbon electrode in pure ionic liquids I-IL vs Fc,  $\nu = 0.1 \text{ V.s}^{-1}$ ,  $T = 60^\circ\text{C}$ . I-IL (black trace), after 5s of electrolysis at  $E_{\text{app}} = 0.4 \text{ V vs Fc}$  (blue trace), with addition of TBAI at  $c = 1.5 \text{ mM}$  in I-IL (red dot).



## 4. Single Crystal XRD

Single crystals were analyzed on a *Bruker* APEX-II with graphite monochromator, Cu K $\alpha$  radiation from a microfocus sealed tube. The Structure was solved using the Olex2 software package in combination with ShelXL and ShelXT.<sup>4,5</sup> Pictures of the structures were generated with Diamond 4.<sup>6</sup>

**Table S1.** Crystal data and structure refinement for [I-IL, I<sup>-</sup>]

|                          |                                                                        |
|--------------------------|------------------------------------------------------------------------|
| Empirical formula        | 2(C <sub>6</sub> H <sub>10</sub> IN <sub>2</sub> ), I <sub>3</sub> , I |
| Formula weight [g/mol]   | 981,72                                                                 |
| Crystal system           | orthorhombic                                                           |
| Space group              | -P 2ac 2ab                                                             |
| Lattice parameters [Å]   |                                                                        |
| a                        | 15.7331(3)                                                             |
| b                        | 13.3955(3)                                                             |
| c                        | 23.5749(5)                                                             |
| $\alpha$                 | 90                                                                     |
| $\beta$                  | 90                                                                     |
| $\gamma$                 | 90                                                                     |
| Volume [Å <sup>3</sup> ] | 4968.5 (2)                                                             |
| Z, Z'                    | <b>Z:</b> 8 <b>Z':</b> 0                                               |
| Temperature [K]          | 100(1)                                                                 |
| Diffraction Device       | XtaLAB Synergy,<br>Dualflex, HyPix                                     |
| Radiation Type           | 0.71073 Å (Mo K $\alpha$ micro-<br>focus sealed X-ray tube)            |

**Table S2.** Crystal data and structure refinement for [I-IL, Br<sup>-</sup>]

|                                 |                                                             |
|---------------------------------|-------------------------------------------------------------|
| Empirical formula               | C <sub>6</sub> H <sub>10</sub> IN <sub>2</sub> , Br         |
| Formula weight [g/mol]          | 316.97                                                      |
| Crystal system                  | orthorhombic                                                |
| Space group                     | -P 2ac 2ab                                                  |
| Lattice parameters [Å]          |                                                             |
| a                               | 11.7188(9)                                                  |
| b                               | 11.8757(9)                                                  |
| c                               | 13.5901(10)                                                 |
| $\alpha$                        | 90                                                          |
| $\beta$                         | 90                                                          |
| $\gamma$                        | 90                                                          |
| Density [g/cm <sup>3</sup> ]    | 2.226                                                       |
| Crystal size [mm <sup>3</sup> ] | 0.270 x 0.240 x 0.110                                       |
| Volume [Å <sup>3</sup> ]        | 1891.3(2)                                                   |
| Z, Z'                           | <b>Z:</b> 8 <b>Z':</b> 0                                    |
| Temperature [K]                 | 100(1)                                                      |
| Diffraction Device              | XtaLAB Synergy,<br>Dualflex, HyPix                          |
| Radiation Type                  | 0.71073 Å (Mo K $\alpha$ micro-<br>focus sealed X-ray tube) |

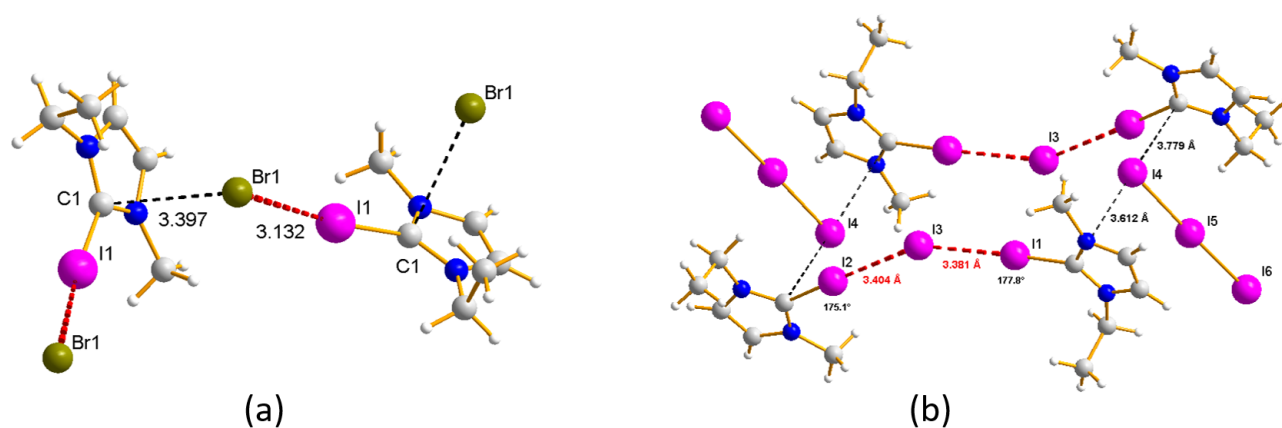

**Figure S13:** Short interatomic distances corresponding to non-covalent XB and  $\pi$ -anion interactions in compounds (a)  $[I-IL, Br^-]$  and (b)  $[I-IL, I^-]$ .

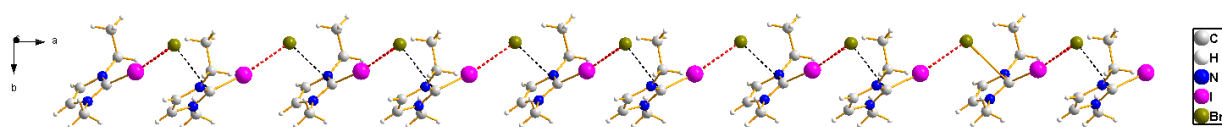

**Figure S14:** One-dimensional polymeric chain of  $[I-IL, Br^-]$  with alternating XB donor ( $I-IL^+$ ) and acceptor ( $Br^-$ ) units.

## 5. NMR Titration

For the NMR titrations 1 mM stock solutions of the hosts **Me-IL**, **H-IL**, and **I-IL**, as well as 100 mM guest (tetrabutylammonium chloride, bromide, iodide, nitrate and nitrophenoxide) solutions with 1mM of host were prepared in dry DMSO- $D_6$ /HMDS (99.5/0.5 v/v). For each measurement, a single NMR tube was prepared by adding first the host, then the guest to the tube and, filling to an overall of 500  $\mu$ L.

### 6.1 NMR titration with H-IL

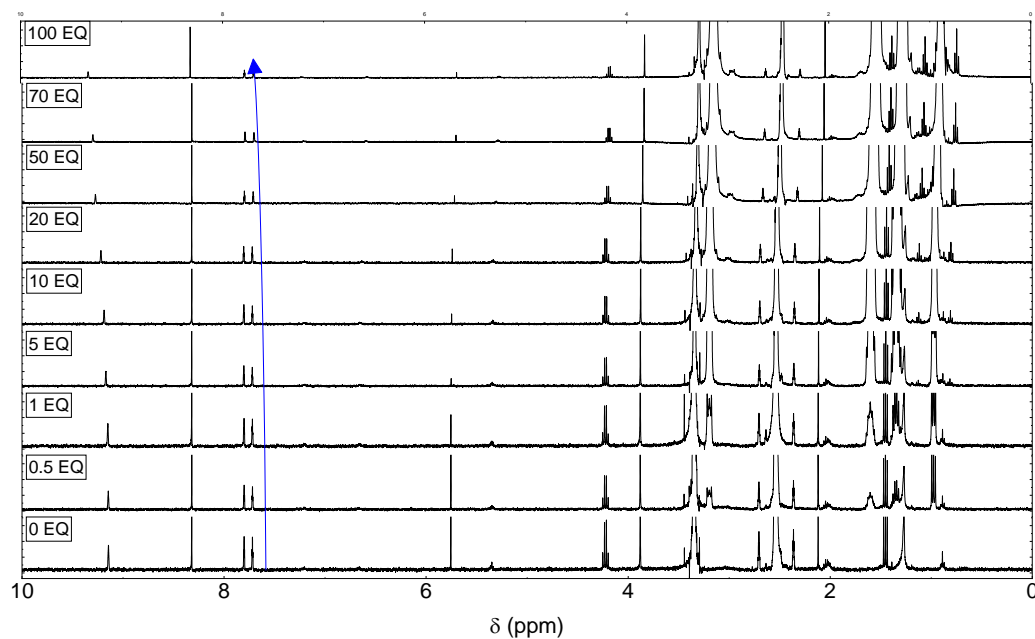

**Figure S15:** NMR spectra of titration of **H-IL** with Cl<sup>-</sup> in DMSO. The blue trace indicates the shift of the signals of interest.

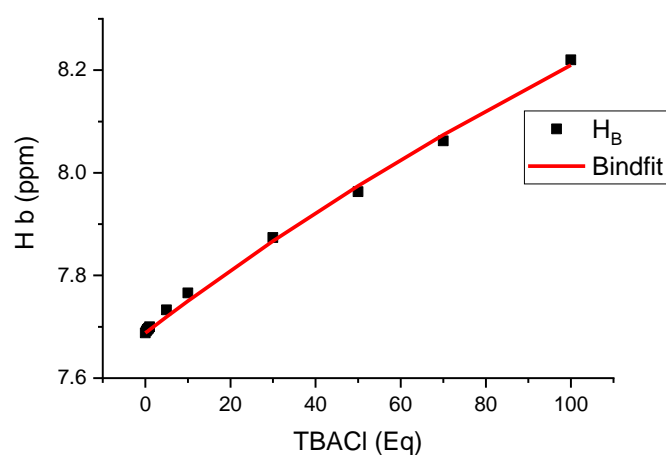

**Figure S16:** Variation of the NMR signal  $H_b$  as function of added equivalents of Chloride. The red curve was obtained by numerical simulation representing the best fit to the experimental data based on a 1 : 1 stoichiometry using Bindfit.

## 6.2 NMR titration with Me-IL

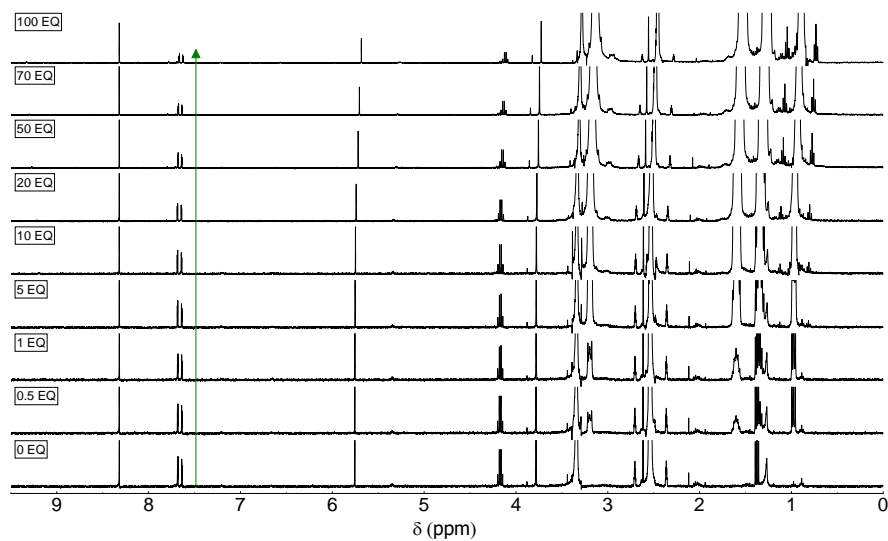

**Figure S17:** NMR spectra of titration of H-IL with Cl<sup>-</sup> in DMSO. The green trace indicates the shift of the signals of interest.

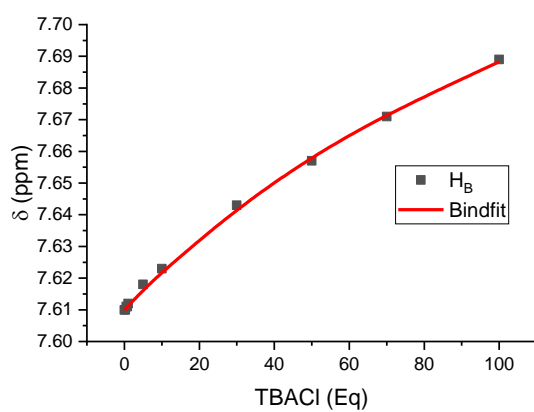

**Figure S18:** Variation of the NMR signal  $H_B$  as function of added equivalents of Chloride. The red curve was obtained by numerical simulation representing the best fit to the experimental data based on a 1 : 1 stoichiometry using Bindfit.

### 6.3 NMR titration with I-IL

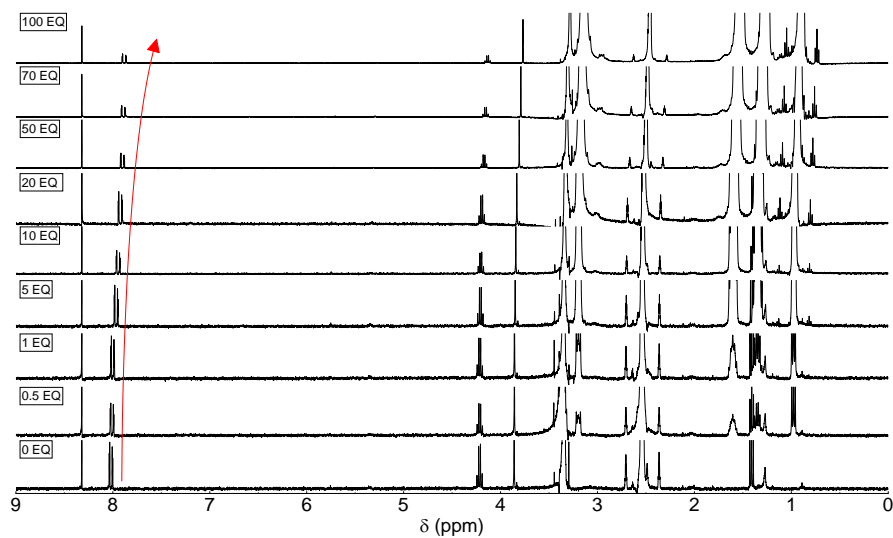

**Figure S19:** NMR spectra of titration of I-IL with Cl<sup>-</sup> in DMSO. The red trace indicates the shift of the signals of interest.

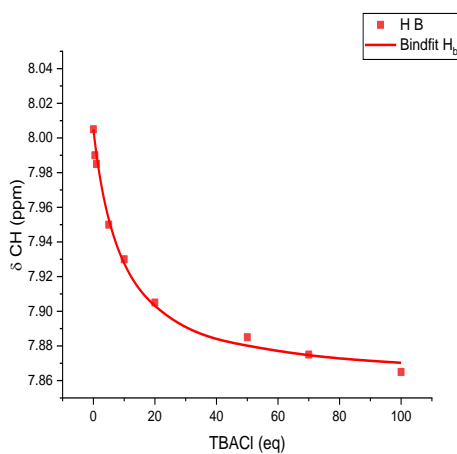

**Figure S20:** Variation of the NMR signal  $H_B$  as function of added equivalents of Chloride. The red curve was obtained by numerical simulation representing the best fit to the experimental data based on a 1 : 1 stoichiometry using Bindfit.

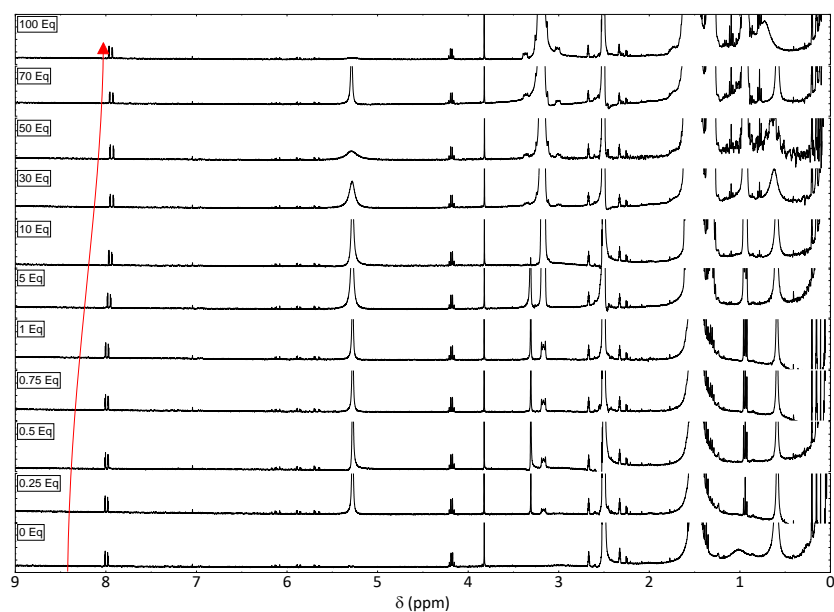

**Figure S21:** NMR spectra of titration of I-IL with Br<sup>-</sup> in DMSO. The red trace indicates the shift of the signals of interest.

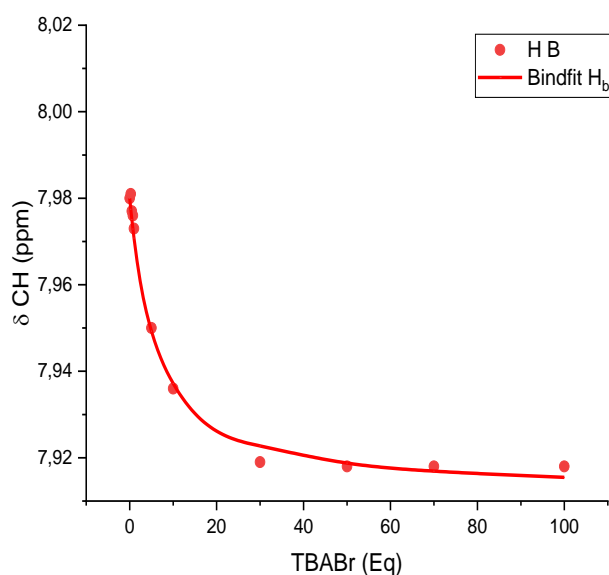

**Figure S22:** Variation of the NMR signal H<sub>B</sub> as function of added equivalents of Bromide. The red curve was obtained by numerical simulation representing the best fit to the experimental data based on a 1 : 1 stoichiometry using Bindfit.

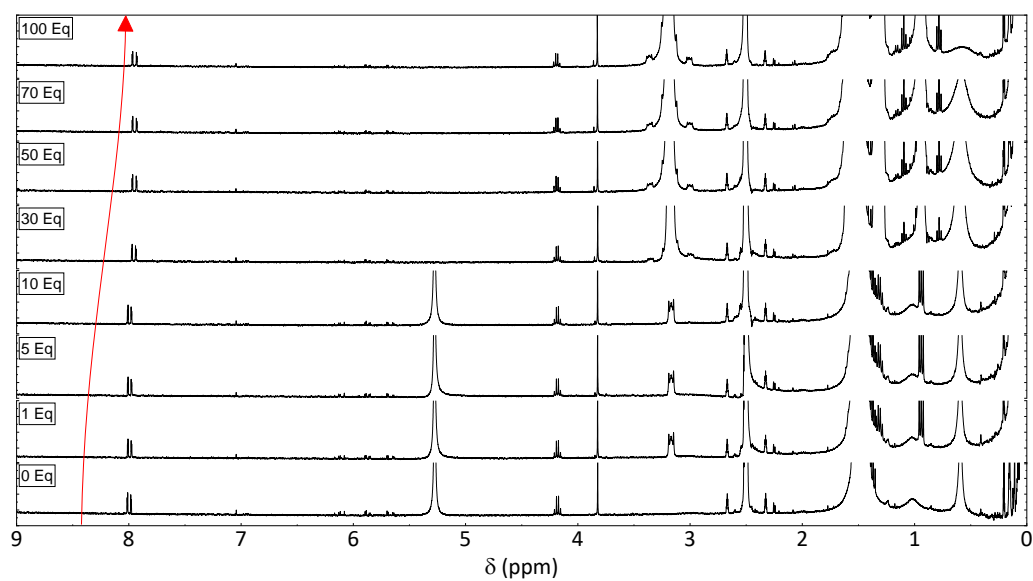

**Figure S23:** NMR spectra of titration of I-IL with I<sup>-</sup> in DMSO. The red trace indicates the shift of the signals of interest.

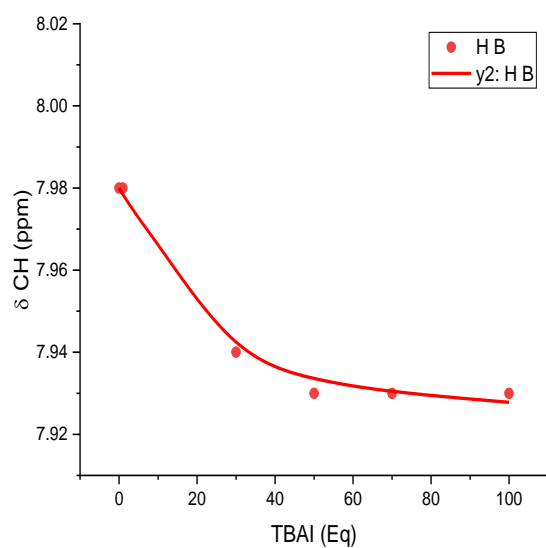

**Figure S24:** Variation of the NMR signal H<sub>B</sub> as function of added equivalents of iodide. The red curve was obtained by numerical simulation representing the best fit to the experimental data based on a 1 : 1 stoichiometry using Bindfit.

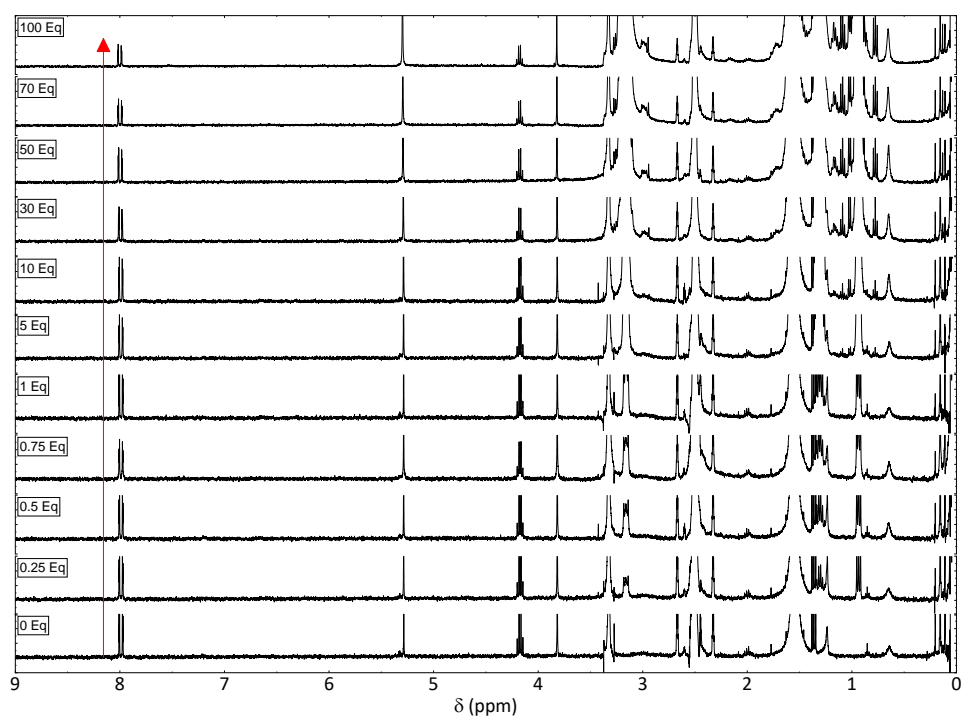

**Figure S25:** NMR spectra of titration of I-IL with  $\text{NO}_3^-$  in DMSO. The red trace indicates the shift of the signals of interest.

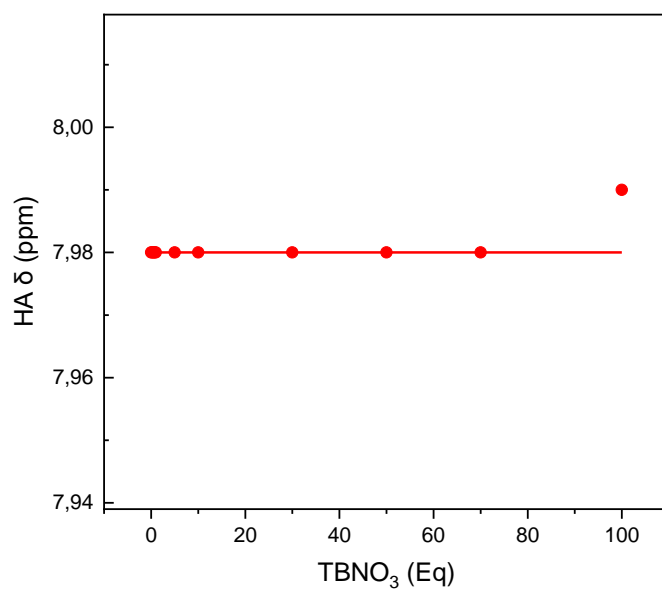

**Figure S26** Variation of the NMR signal  $\text{H}_B$  as function of added equivalents of nitrate. The red curve was obtained by numerical simulation representing the best fit to the experimental data based on a 1 : 1 stoichiometry using Bindfit.



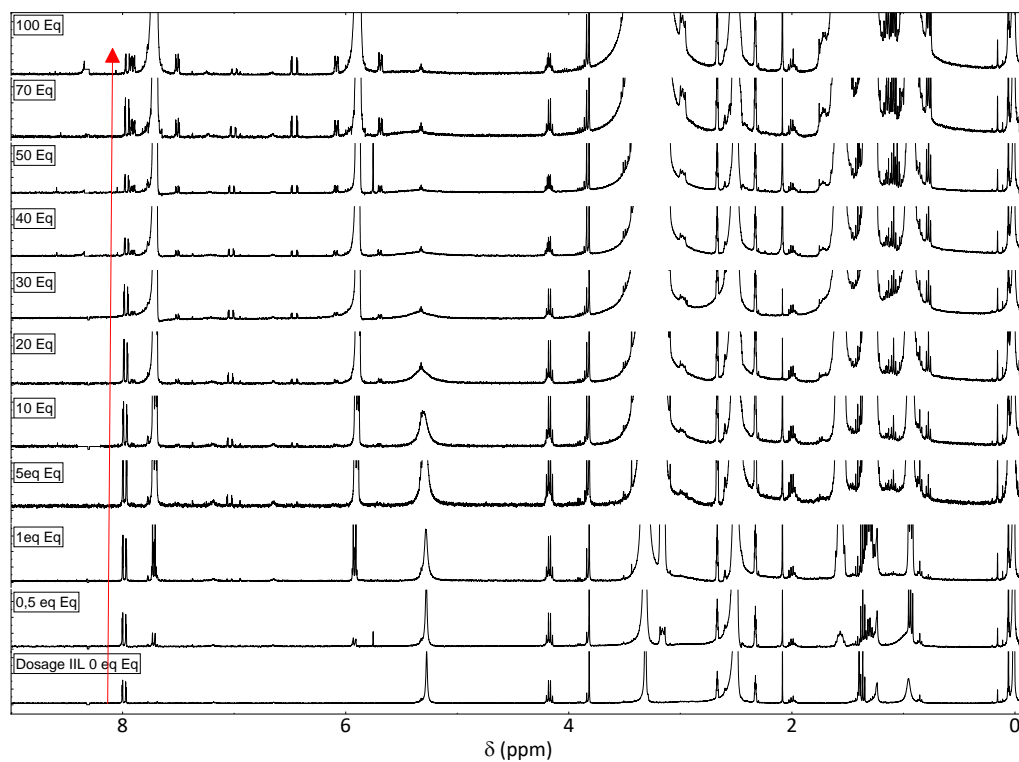

**Figure S27:** NMR spectra of titration of I-IL with  $\text{NO}_2\text{PhO}^-$  in DMSO. The red trace indicates the shift of the signals of interest.

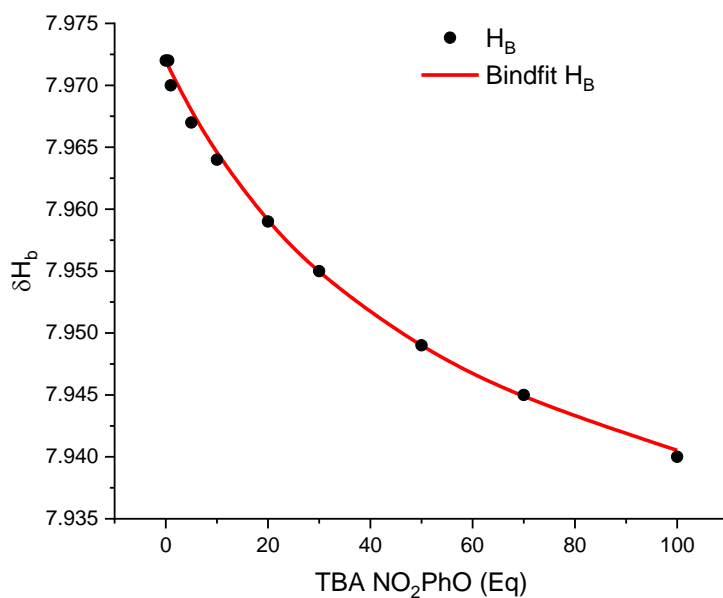

**Figure S28:** Variation of the NMR signal  $\text{H}_B$  as function of added equivalents of nitrophenolate. The red curve was obtained by numerical simulation representing the best fit to the experimental data based on a 1 : 1 stoichiometry using Bindfit.

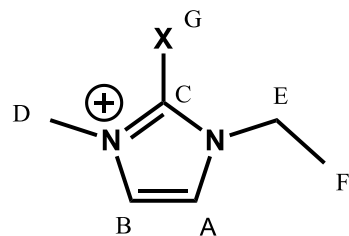

with X = H, Me or I

**Table S2.** NMR-titration table for (**Me-IL**, **H-IL**, **I-IL**) with **TBAX** (X = Cl, Br, I, NO<sub>3</sub>, NO<sub>2</sub>PhO) in DMSO/HMDS

|                 |              |            |                             |                              |                              |                             |                             |                              | <b>H-IL/Cl<sup>-</sup></b> |                      | <b>Me-IL/Cl<sup>-</sup></b> |                      | <b>I-IL/Cl<sup>-</sup></b> | <b>I-IL/Br<sup>-</sup></b> | <b>I-IL/I<sup>-</sup></b> | <b>I-IL/NO<sub>3</sub><sup>-</sup></b> | <b>I-IL/NO<sub>2</sub>PhO<sup>-</sup></b> |
|-----------------|--------------|------------|-----------------------------|------------------------------|------------------------------|-----------------------------|-----------------------------|------------------------------|----------------------------|----------------------|-----------------------------|----------------------|----------------------------|----------------------------|---------------------------|----------------------------------------|-------------------------------------------|
| <b>Tube Nr.</b> | <b>V [a]</b> | <b>G/H</b> | <b>V<sub>Host</sub> [a]</b> | <b>V<sub>Guest</sub> [a]</b> | <b>n<sub>Guest</sub> [b]</b> | <b>n<sub>Host</sub> [b]</b> | <b>c<sub>Host</sub> [c]</b> | <b>c<sub>Guest</sub> [c]</b> | <b>H<sub>B</sub></b>       | <b>H<sub>C</sub></b> | <b>H<sub>B</sub></b>        | <b>H<sub>G</sub></b> | <b>H<sub>B</sub></b>       | <b>H<sub>B</sub></b>       | <b>H<sub>B</sub></b>      | <b>H<sub>B</sub></b>                   | <b>H<sub>B</sub></b>                      |
| 1               | 500          | 0          | 500                         | 0                            | 0.00                         | 0.5                         | 0.0010                      | 0.0000                       | 7.688                      | 9.141                | 7.61                        | 2.616                | 7.975                      | 7.98                       | 7.980                     | 7.980                                  | 7.972                                     |
| 2               | 500          | 0.25       | 498.75                      | 1.25                         | 0.13                         | 0.5                         | 0.0010                      | 0.0003                       | 7.692                      | -                    | 7.61                        | -                    | -                          | 7.977                      | -                         | 7.980                                  | -                                         |
| 3               | 500          | 0.5        | 497.5                       | 2.5                          | 0.25                         | 0.5                         | 0.0010                      | 0.0005                       | 7.695                      | 9.153                | 7.611                       | 2.616                | 7.968                      | 7.975                      | -                         | 7.980                                  | 7.972                                     |
| 4               | 500          | 0.75       | 496.25                      | 3.75                         | 0.38                         | 0.5                         | 0.0010                      | 0.0008                       | 7.697                      | -                    | 7.611                       | -                    | -                          | 7.973                      | -                         | 7.980                                  | -                                         |
| 5               | 500          | 1          | 495                         | 5                            | 0.5                          | 0.5                         | 0.0010                      | 0.0010                       | 7.7                        | 9.152                | 7.612                       | 2.615                | 7.961                      | 7.971                      | 7.977                     | 7.980                                  | 7.970                                     |
| 6               | 500          | 5          | 475                         | 25                           | 2.5                          | 0.5                         | 0.0010                      | 0.0050                       | 7.733                      | 9.174                | 7.618                       | 2.614                | 7.923                      | 7.949                      | -                         | 7.980                                  | 7.967                                     |
| 7               | 500          | 10         | 450                         | 50                           | 5                            | 0.5                         | 0.0010                      | 0.0100                       | 7.766                      | 9.191                | 7.623                       | 2.612                | 7.898                      | 7.937                      | 7.959                     | 7.980                                  | 7.964                                     |
| 8               | 500          | 20         | 300                         | 100                          | 10                           | 0.5                         | 0.0010                      | 0.0200                       | 7.874                      | 9.222                | 7.643                       | 2.606                | 7.873                      | 7.927                      | 7.948                     | -                                      | 7.959                                     |
| 9               | 500          | 30         | 350                         | 150                          | 15                           | 0.5                         | 0.0010                      | 0.0300                       | 7.963                      | -                    | 7.657                       | -                    | -                          | 7.922                      | 7.942                     | 7.980                                  | 7.955                                     |
| 10              | 500          | 50         | 250                         | 250                          | 25                           | 0.5                         | 0.0010                      | 0.0500                       | 8.062                      | 9.273                | 7.671                       | 2.588                | 7.850                      | 7.918                      | 7.938                     | 7.980                                  | 7.949                                     |
| 11              | 500          | 70         | 150                         | 350                          | 35                           | 0.5                         | 0.0010                      | 0.0700                       | 8.22                       | 9.301                | 7.689                       | 2.576                | 7.845                      | 7.917                      | 7.930                     | 7.980                                  | 7.945                                     |
| 12              | 500          | 100        | 0                           | 500                          | 50                           | 0.5                         | 0.0010                      | 0.1000                       | 7.688                      | 9.333                | 7.61                        | 2.556                | 7.840                      | 7.915                      | 7.927                     | 7.991                                  | 7.94                                      |

[a] in  $\mu\text{L}$ ; [b] in  $\mu\text{mol}$ ; [c] in M

## 6. Electrochemical behavior of Lewis Bases in ILs

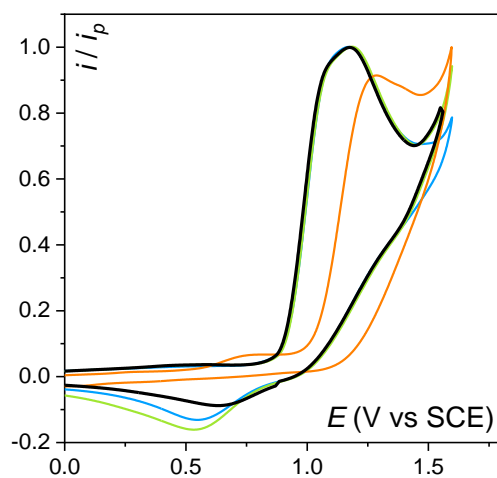

**Figure S29:** CV of TBACl (10 mM) in DMF with 0.1 M of various supporting electrolyte: **TBAPF<sub>6</sub>** (black trace), **H-IL** (blue trace), **Me-IL** (green trace) and **I-IL** (orange trace).  $T = 40^{\circ}\text{C}$ ;  $\nu = 0.1 \text{ V.s}^{-1}$

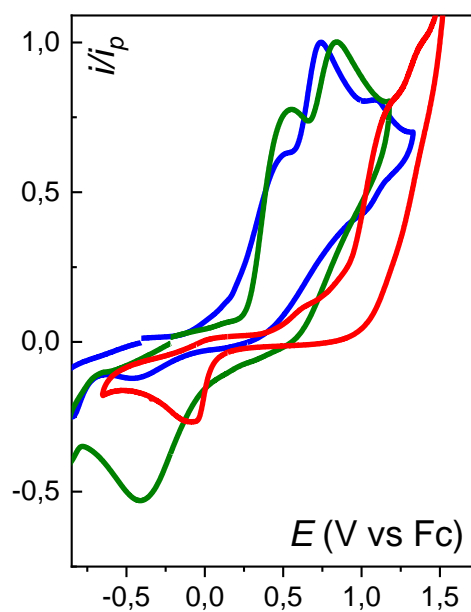

**Figure S30:** Normalised CV of TBABr (50 mM) on glassy carbon electrode in **H-IL** (blue trace) at  $40^{\circ}\text{C}$ , **Me-IL** (green trace) at  $40^{\circ}\text{C}$ , and **I-IL** (red trace) at  $60^{\circ}\text{C}$ .  $\nu = 0.1 \text{ V.s}^{-1}$

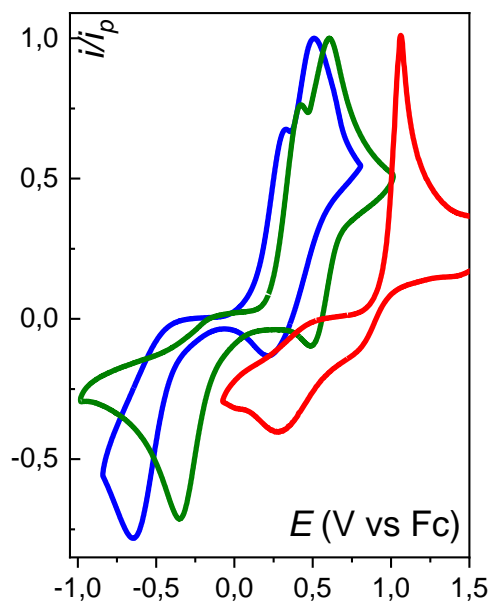

**Figure S31:** Normalised CV of TBAI (50 mM) on glassy carbon electrode in **H-IL** (blue trace) at 40°C, **Me-IL** (green trace) at 40°C, and **I-IL** (red trace) at 60°C.  $v = 0.1 \text{ V.s}^{-1}$

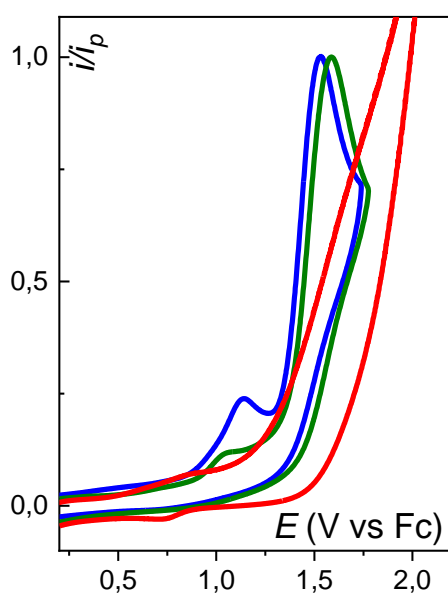

**Figure S32:** Normalised CV of  $\text{TBANO}_3$  (50 mM) on glassy carbon electrode in **H-IL** (blue trace) at 40°C, **Me-IL** (green trace) at 40°C, and **I-IL** (red trace) at 60°C.  $v = 0.1 \text{ V.s}^{-1}$

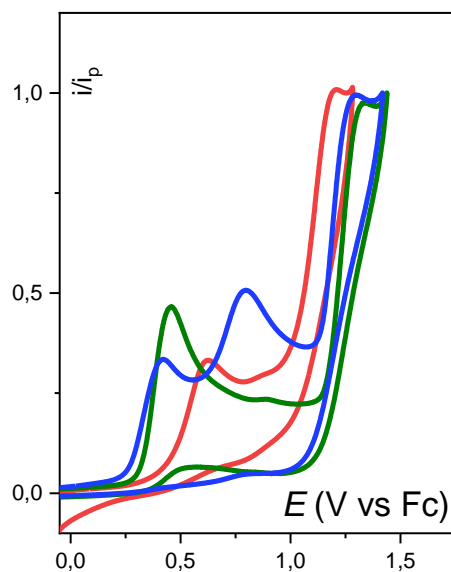

**Figure S33:** Normalised CV of TBANO<sub>2</sub>PhO (50 mM) on glassy carbon electrode in **H-IL** (blue trace) at 40°C, **Me-IL** (green trace) at 40°C, and **I-IL** (red trace) at 60°C.  $\nu = 0.1 \text{ V.s}^{-1}$

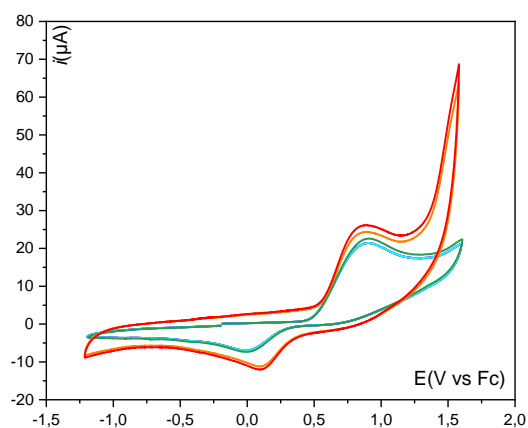

**Figure S34:** CV of Chloride (30 mM) on glassy carbon electrode in **Me-IL** (black trace) at 40°C, and after addition of H<sub>2</sub>O, 0.2 (blue trace), 0.4 (pink trace), 0.6 (cyan trace), 1%wt (green trace), 1.6 (orange trace) and 2% wt (red trace).  $\nu = 0.1 \text{ V.s}^{-1}$

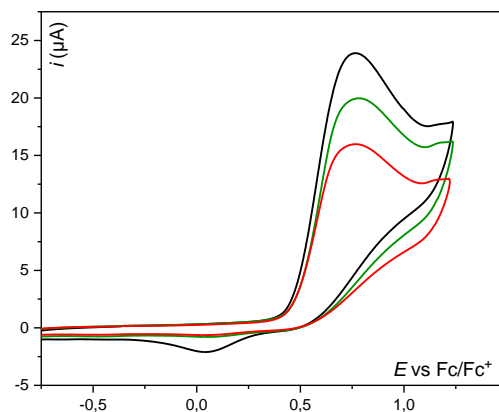

**Figure S35:** CV of Chloride (10 mM) on glassy carbon electrode in **H-IL** (black trace) at 40°C, and after addition of H<sub>2</sub>O, 1%wt (green trace) and 2% wt (red trace).  $\nu = 0.1 \text{ V.s}^{-1}$

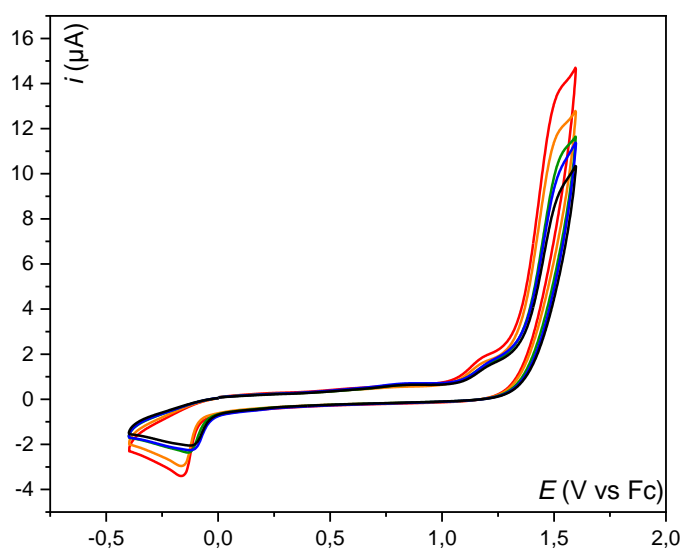

**Figure S36:** CV of Chloride (25 mM) on glassy carbon electrode in I-IL (black trace) at 60°C, and after addition of H<sub>2</sub>O, 0.5%Wt (blue trace), 1%wt (green trace) 1.5%wt (orange trace) and 2% wt (red trace).  $\nu = 0.1 \text{ V.s}^{-1}$

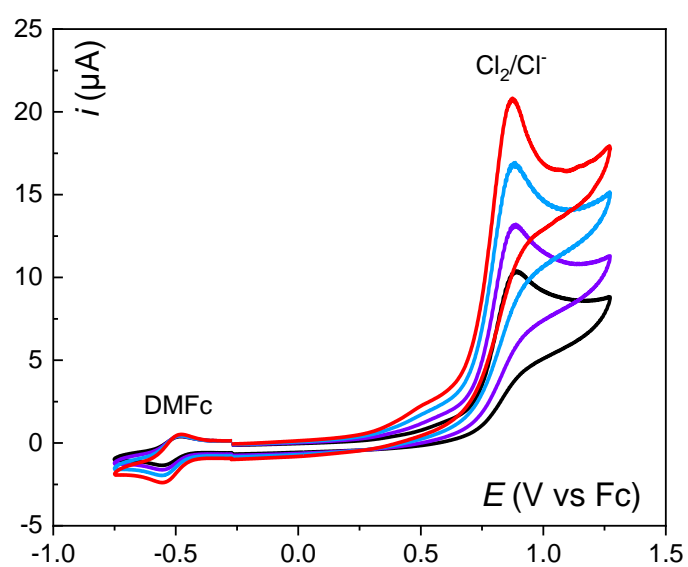

**Figure S37:** CV of Chloride (10 mM) on glassy carbon electrode in Me-IL (black trace) at 30°C, at 40°C (purple trace), at 50°C (blue trace) and 60°C (red trace) and after addition of H<sub>2</sub>O 1%wt.  $\nu = 0.1 \text{ V.s}^{-1}$

## 7. NMR spectra of commercially TBAX

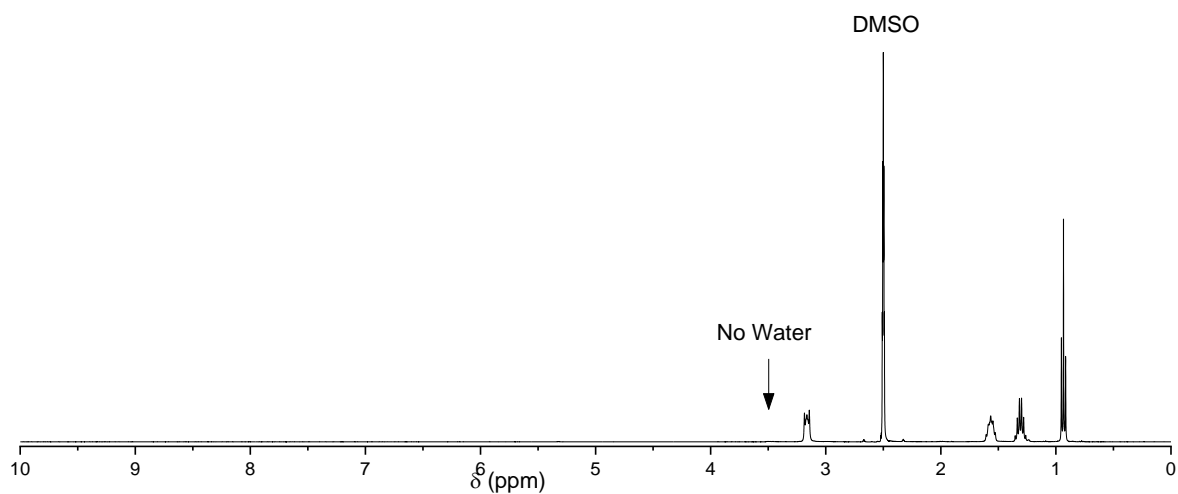

**Figure S38:** NMR spectra  $^1\text{H}$  of titration Tetrabutylammonium chloride (TBACl) in  $\text{DMSO-d}_6$

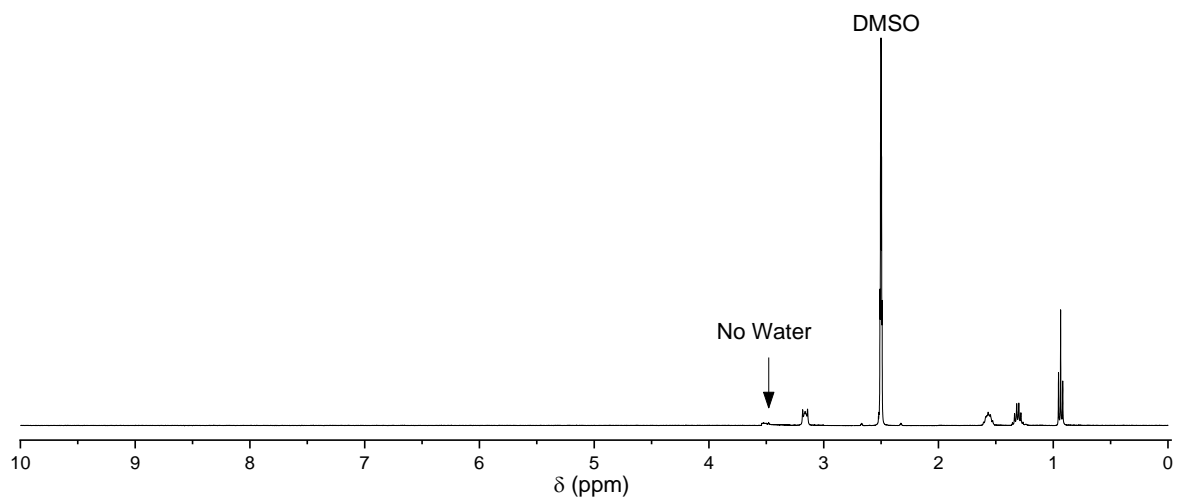

**Figure S39:** NMR spectra  $^1\text{H}$  of titration Tetrabutylammonium bromide (TBABr) in  $\text{DMSO-d}_6$

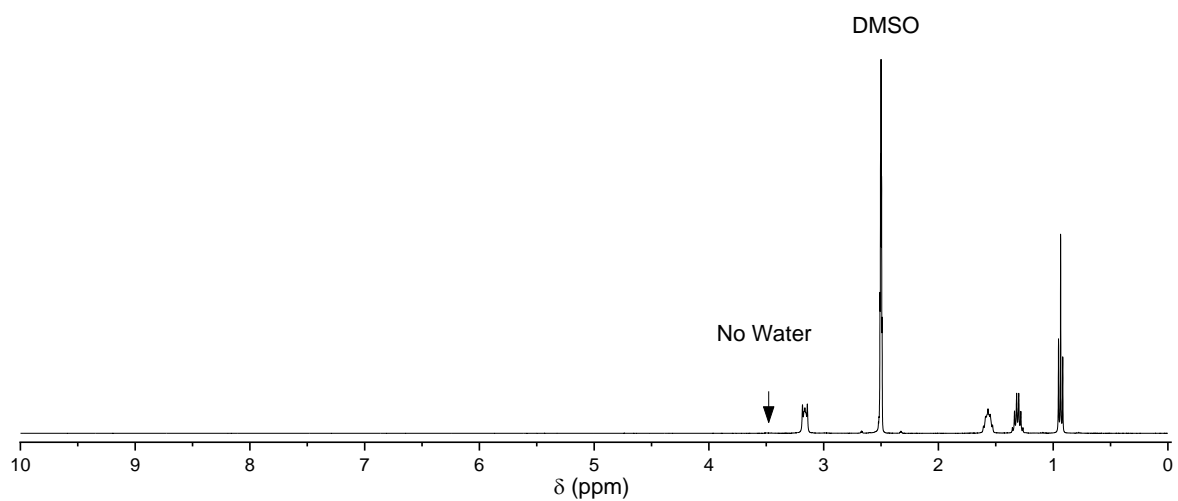

**Figure S40:** NMR spectra  $^1\text{H}$  of titration Tetrabutylammonium iodide (TBAI) in  $\text{DMSO-d}_6$

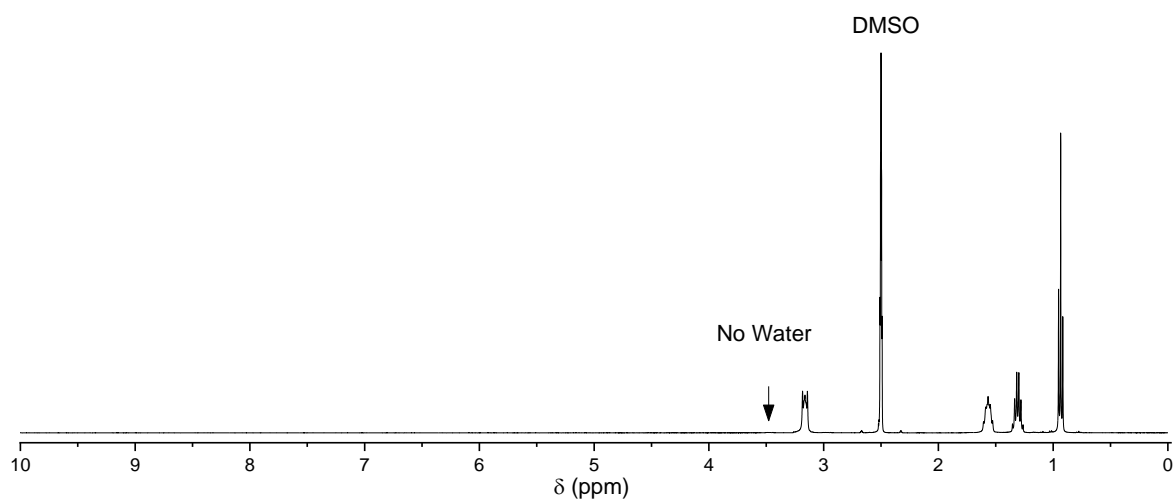

**Figure S41:** NMR spectra  $^1\text{H}$  of titration Tetrabutylammonium nitrate ( $\text{TBANO}_3$ ) in  $\text{DMSO-d}_6$

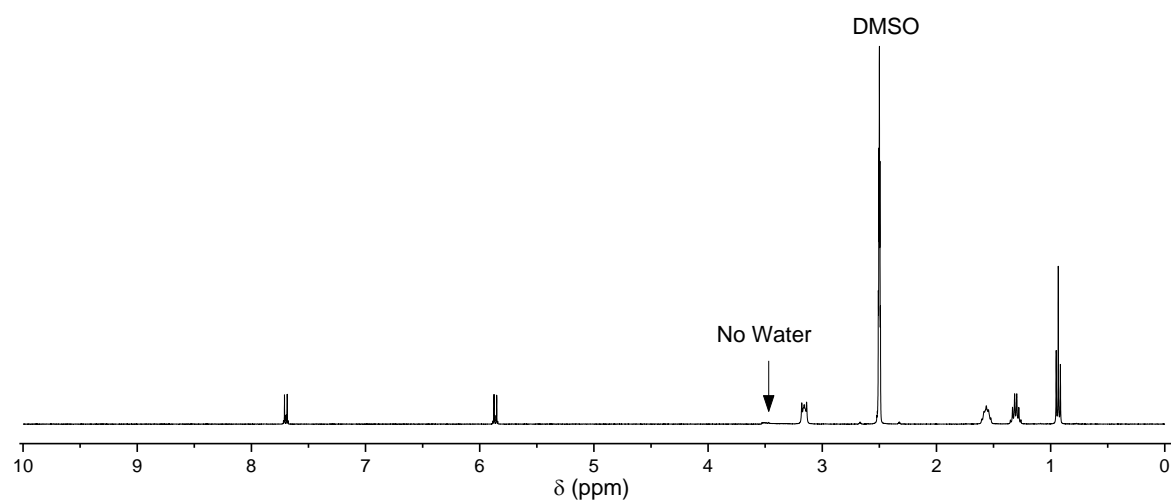

**Figure S42:** NMR spectra  $^1\text{H}$  of titration Tetrabutylammonium p-Nitrophenoxide ( $\text{TBANO}_2\text{PhO}$ ) in  $\text{DMSO-d}_6$

## 8. References

- <sup>1</sup> O. Fontaine, J. Ghilane, P. Martin, J.-C. Lacroix and H. Randriamahazaka, *Langmuir*, 2010, **26**, 18542–18549
- <sup>2</sup> S. Chakraborty, R. Dutta and P. Ghosh, *Chem. Commun.*, 2015, **51**, 14793–14796
- <sup>3</sup> J. M. Fraile, J. I. García, C. I. Herrerías, J. A. Mayoral, S. Gmough and M. Vaultier, *Green Chem*, 2004, **6**, 93–98.
- <sup>4</sup> Sheldrick, G. M. A short history of SHELX. *Acta Crystallogr A Found Crystallogr* **2008**, **64**, 112–122, DOI: 10.1107/S0108767307043930.
- <sup>5</sup> Hübschle, C. B.; Sheldrick, G. M.; Dittrich, B. ShelXle: a Qt graphical user interface for SHELXL. *J. Appl. Crystallogr.* **2011**, **44**, 1281–1284, DOI: 10.1107/S0021889811043202.
- <sup>6</sup> Putz, H.; Brandenburg, K. *Diamond*; Crystal Impact: Bonn, Deutschland, 2014.
